# Supplementary material for: Dose–Response Meta-Analysis of Corticosteroid Effects in SARS Outbreak: A Model for Risk Stratification and Screening Strategy for Osteonecrosis of Femoral Head Post-Corticosteroid Therapy for COVID-19
Source: MDPI journal article supplement (doi:10.3390/life13040907), 2023-03-29
Supplement: s1 [file s1]

# Supplementary Table S1:

Search strategy used in PubMed database (Search date; 30 December 2022)

| <i>Search Topic</i>                                                                            | #   | Search Terms                                                                                                                                                                                                                                                             |
|------------------------------------------------------------------------------------------------|-----|--------------------------------------------------------------------------------------------------------------------------------------------------------------------------------------------------------------------------------------------------------------------------|
| <b>Population:</b><br><i>Human subjects with SARS developing osteonecrosis of femoral head</i> | #1  | ("Severe Acute Respiratory Syndrome Virus"[Mesh]) OR ("SARS-CoV"[Mesh]) OR (SARS-Related Coronavirus[All Fields]) OR (SARS[All Fields])                                                                                                                                  |
|                                                                                                | #2  | ("hip joint"[MeSH]) OR ("hip joint"[All Fields]) OR ("femoral head"[All Fields]) OR ("avascular necrosis"[MeSH]) OR ("osteonecrosis"[MeSH]) OR ("AVN"[All Fields])                                                                                                       |
|                                                                                                | #3  | #1 AND #2                                                                                                                                                                                                                                                                |
| <b>Intervention:</b><br><i>Steroid therapy</i>                                                 | #4  | ("glucocorticoids"[Mesh]) OR ("corticosteroids"[Mesh]) OR ("steroids"[Mesh]) OR ("cortisol"[All Fields]) OR ("steroids"[All Fields]) OR ("corticosteroids"[All Fields]) OR ("glucocorticoids"[All Fields])                                                               |
|                                                                                                | #5  | ("hydrocortisone"[Mesh]) OR ("prednisolone"[Mesh]) OR ("methylprednisolone"[Mesh]) OR ("prednisolone"[All Fields]) OR ("methylprednisolone"[All Fields]) OR ("hydrocortisone"[All Fields])                                                                               |
|                                                                                                | #6  | #4 AND #5                                                                                                                                                                                                                                                                |
| <b>Study design:</b><br><i>Prospective or Retrospective Cohort Studies</i>                     | #7  | #3 AND #6                                                                                                                                                                                                                                                                |
|                                                                                                | #8  | ("prospective studies"[MeSH Terms]) OR "prospective studies"[All Fields] OR "retrospective studies"[MeSH Terms] OR "retrospective studies"[All Fields] OR "retrospective study"[All Fields])                                                                             |
|                                                                                                | #9  | #7 AND #8                                                                                                                                                                                                                                                                |
|                                                                                                | #10 | ("biography"[Publication Type]) OR "comment"[Publication Type] OR "directory"[Publication Type] OR "editorial"[Publication Type] OR "festschrift"[Publication Type] OR "interview"[Publication Type] OR "lecture"[Publication Type] OR "legal case"[Publication Type] OR |

|     |                                                                                                                                                                                                                                                                                                                                                                                                                                                                          |
|-----|--------------------------------------------------------------------------------------------------------------------------------------------------------------------------------------------------------------------------------------------------------------------------------------------------------------------------------------------------------------------------------------------------------------------------------------------------------------------------|
|     | “legislation”[Publication Type] OR “letter”[Publication Type] OR<br>“news”[Publication Type] OR “newspaper article”[Publication Type] OR<br>“patient education handout”[Publication Type] OR “popular work”[Publication<br>Type] OR “congress”[Publication Type] OR “consensus development<br>conference”[Publication Type] OR “consensus development<br>conference, nih”[Publication Type] OR “practice<br>guideline”[Publication Type]) OR “Review”[Publication Type]) |
| #11 | #9 NOT #10                                                                                                                                                                                                                                                                                                                                                                                                                                                               |
